# Supplementary material for: Characterization of the Small RNA Transcriptome of the Diatom, Thalassiosira pseudonana
Source: PubMed Central journal article supplement (PMC3155517; doi:10.1371/journal.pone.0022870), 2011-08-12

chr\_1

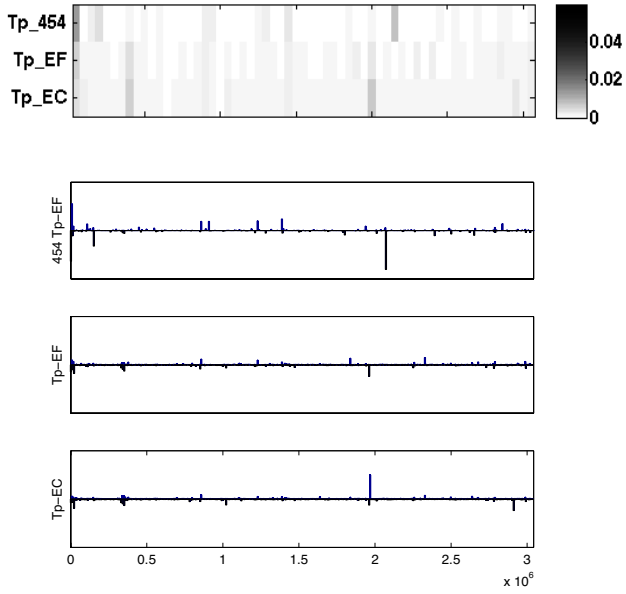

chr\_2

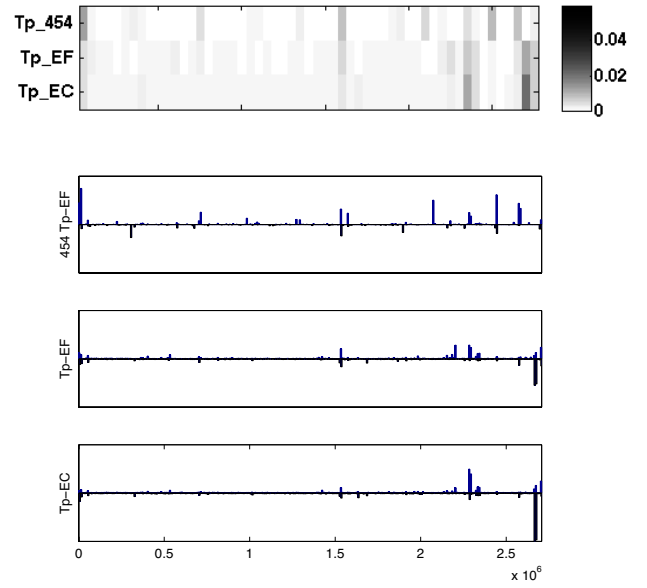

chr\_3

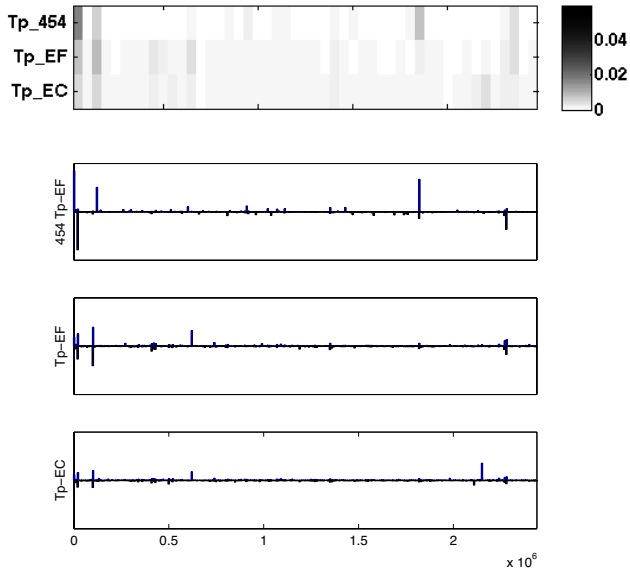

chr\_4

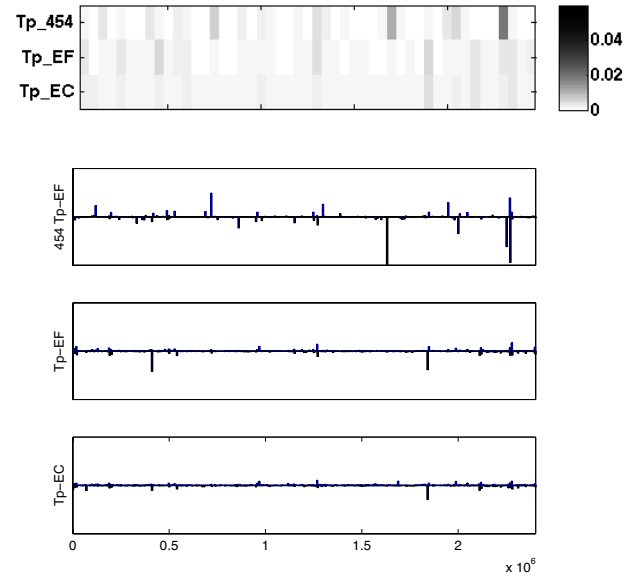

chr\_5

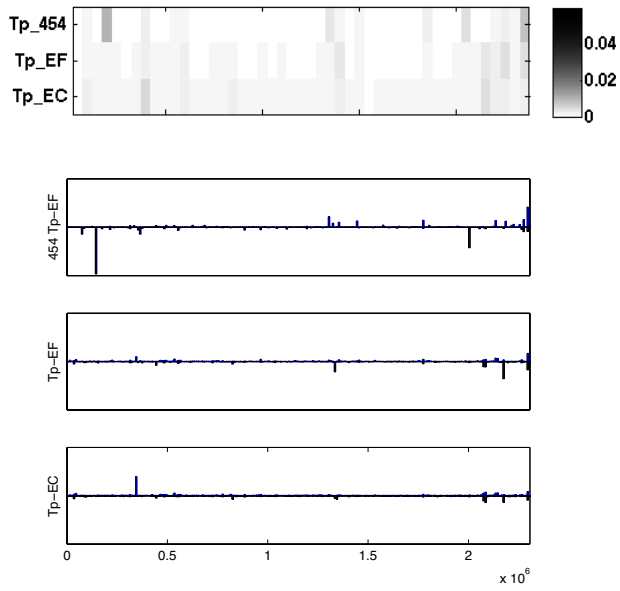

chr\_6

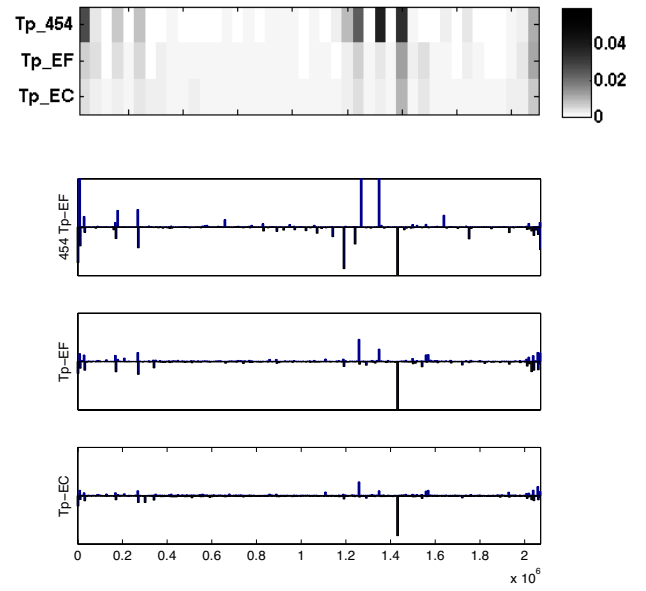

chr\_7

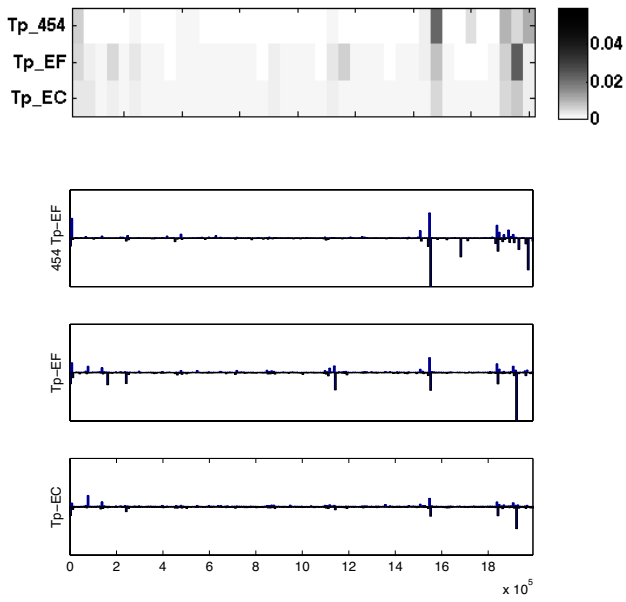

chr\_8

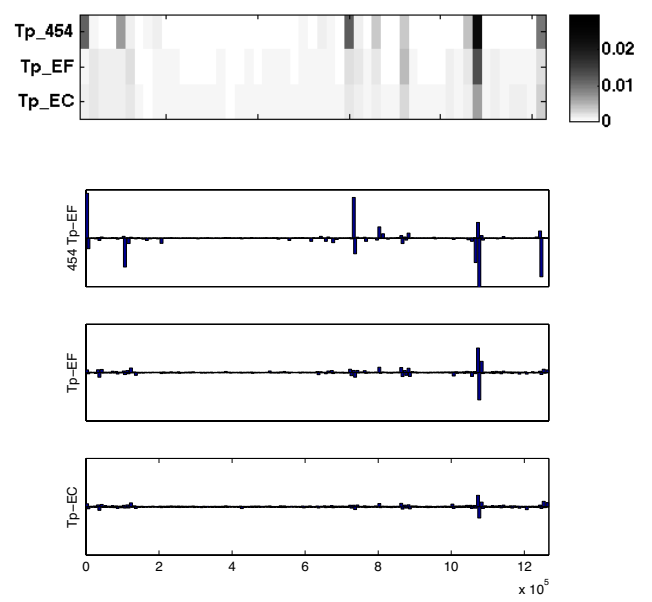

chr\_9

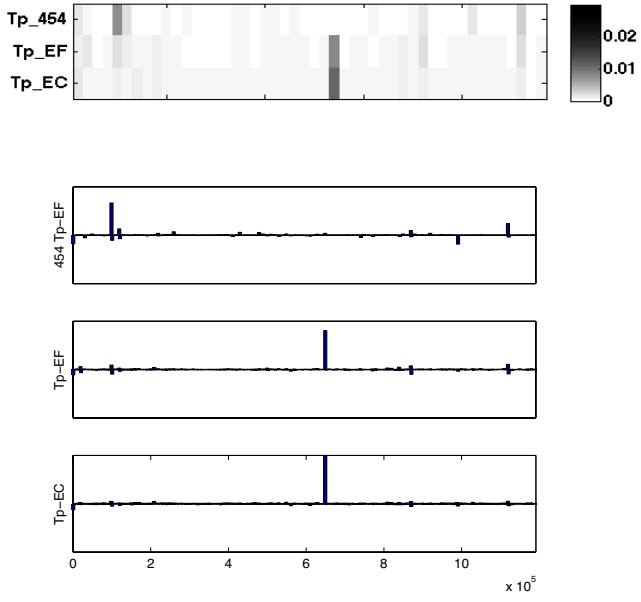

chr\_10

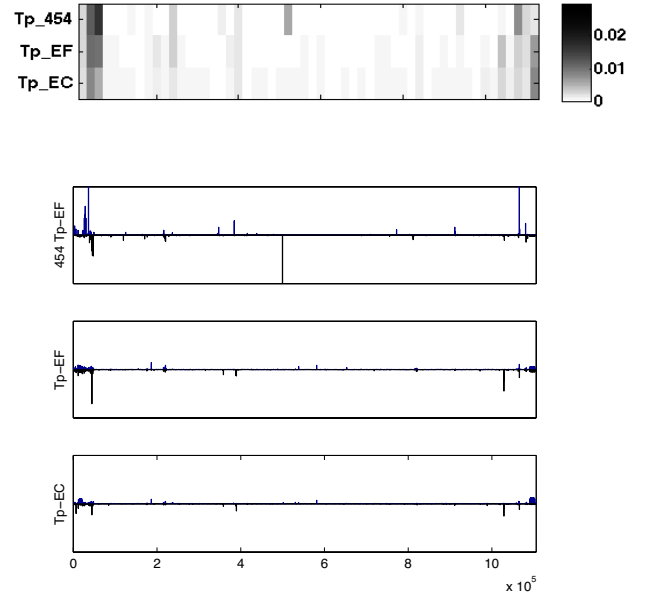

chr\_11a

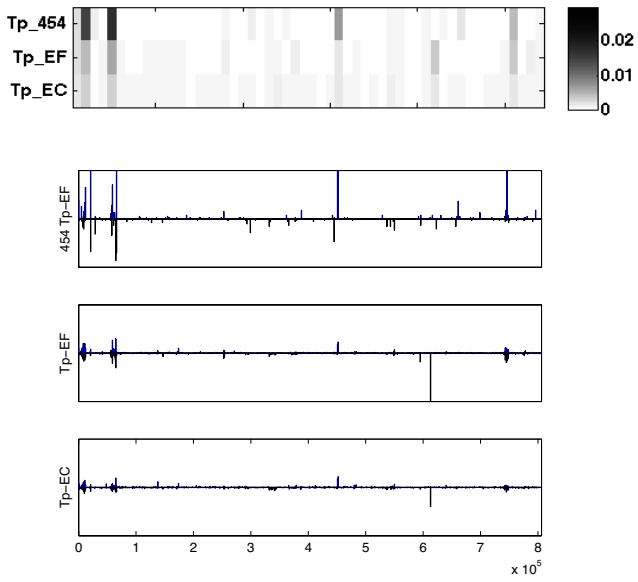

chr\_11b

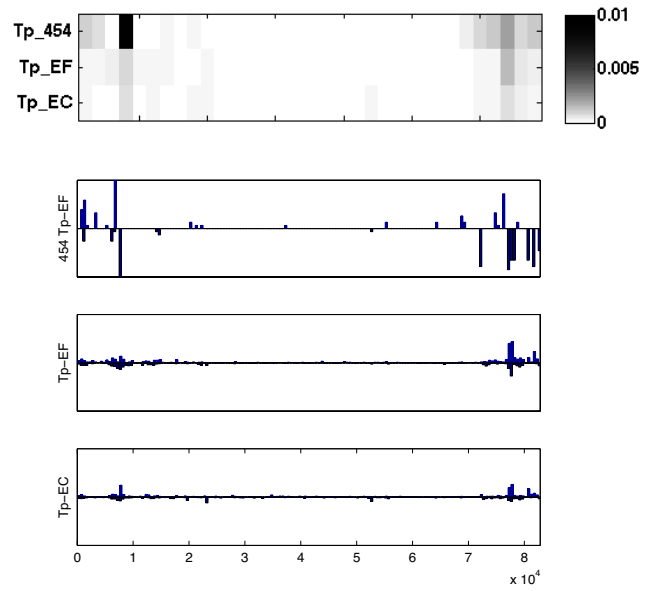

chr\_12

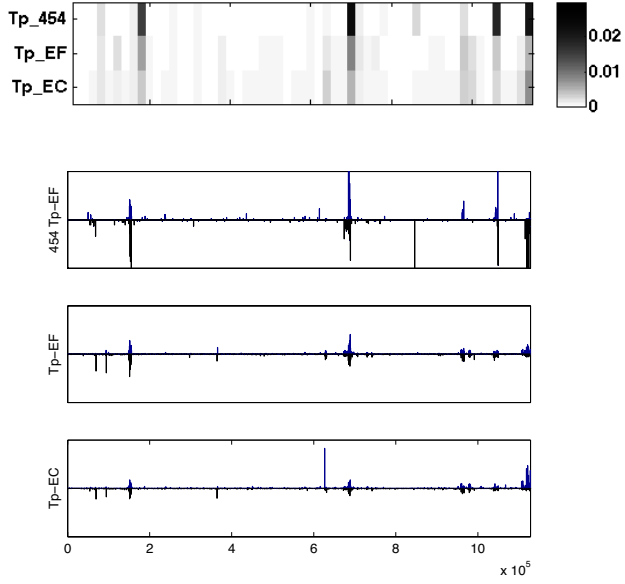

chr\_13

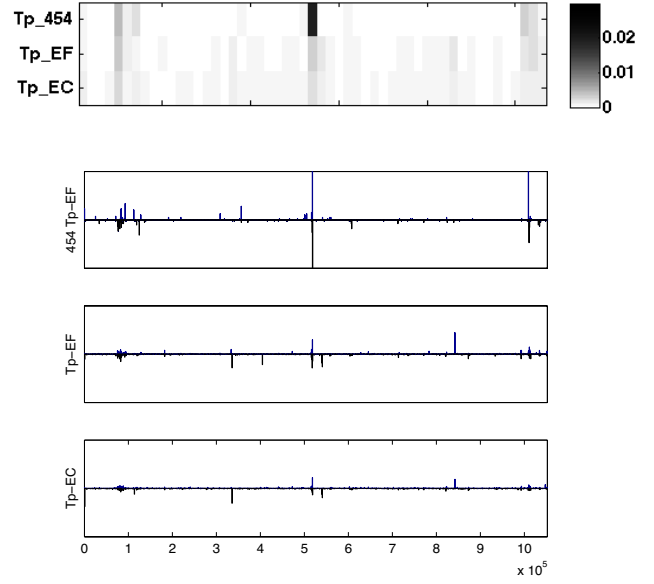

chr\_14

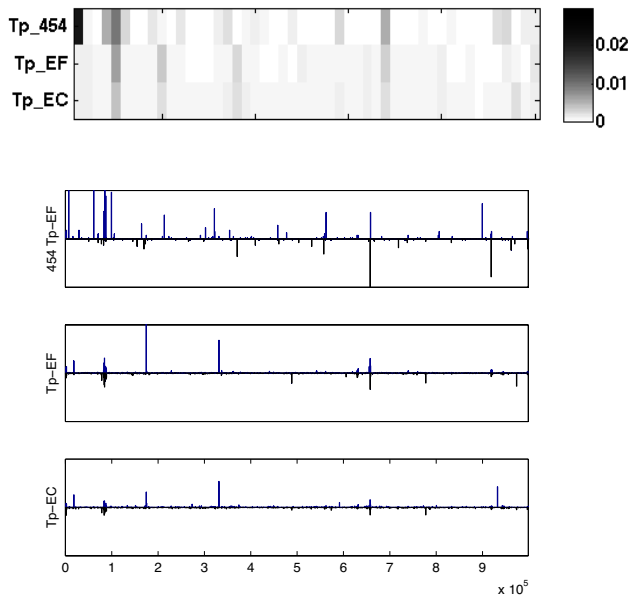

chr\_15

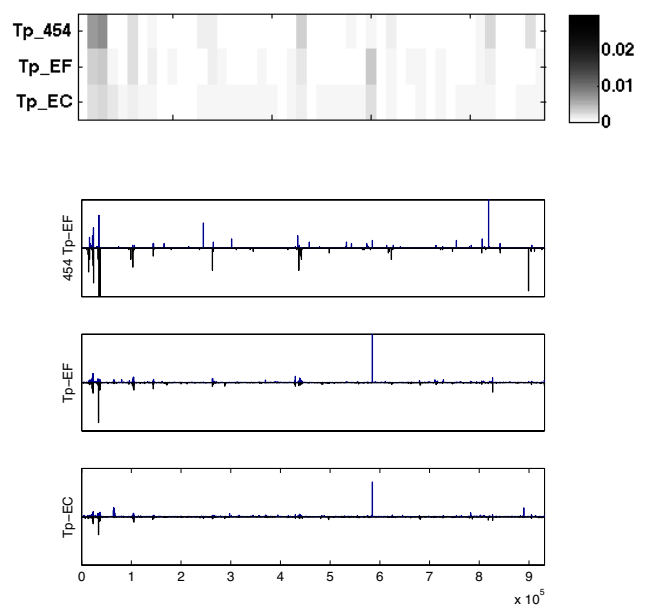

chr\_16a

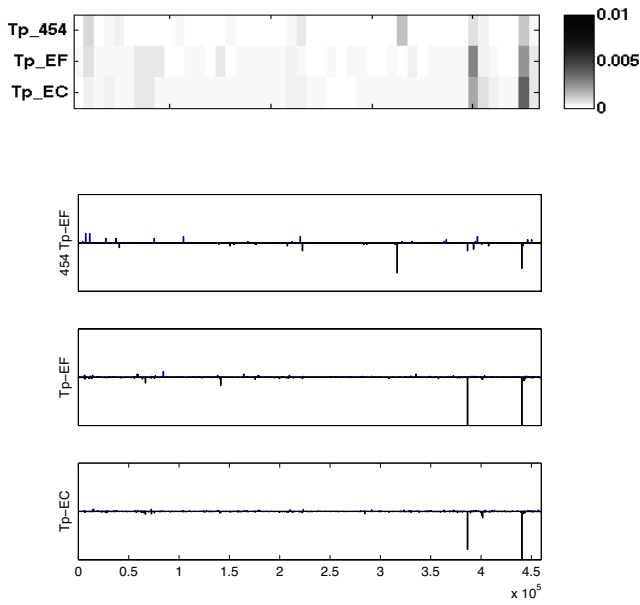

chr\_16b

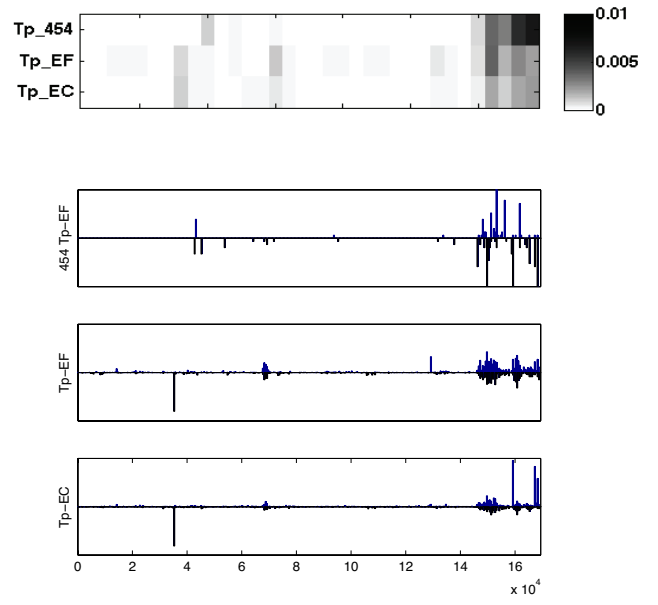

chr\_17

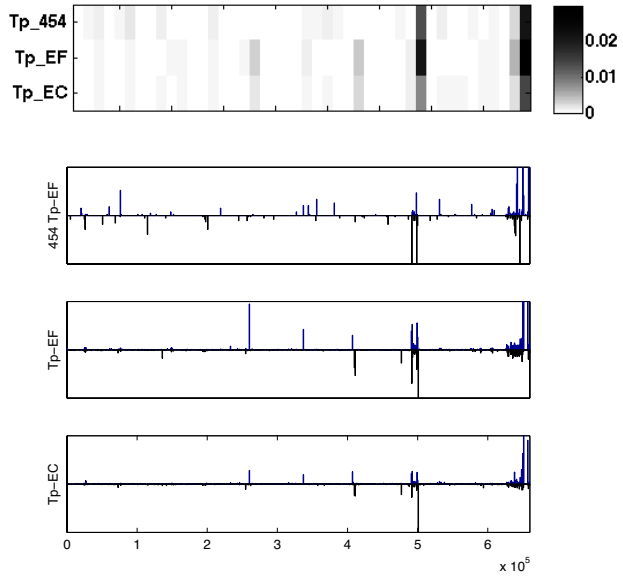

chr\_18

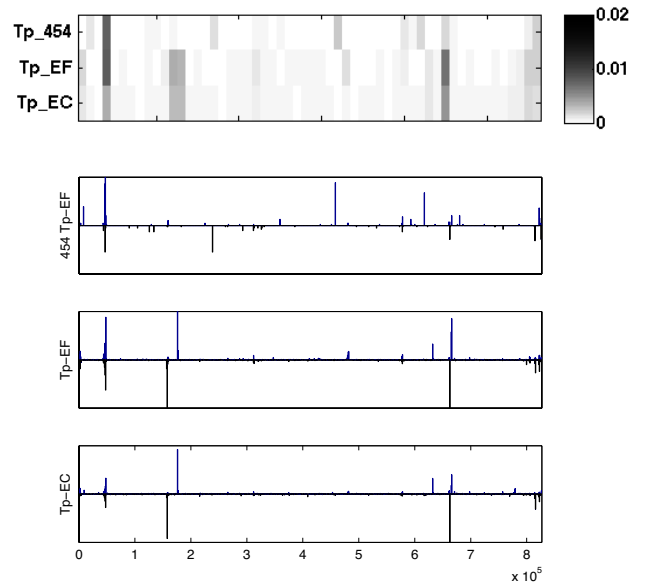

chr\_19a\_19

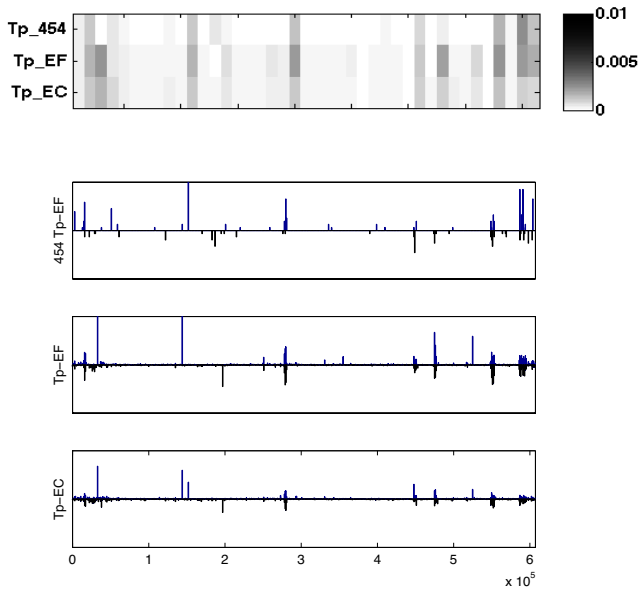

chr\_19b\_31

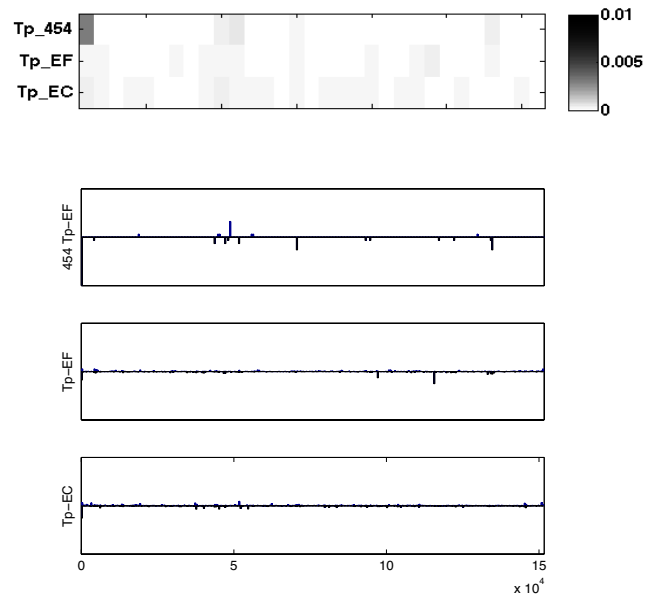

chr\_19c\_29

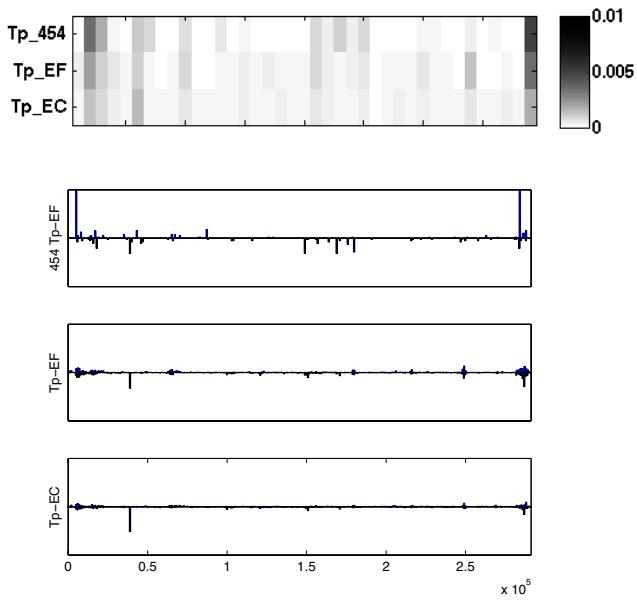

chr\_20

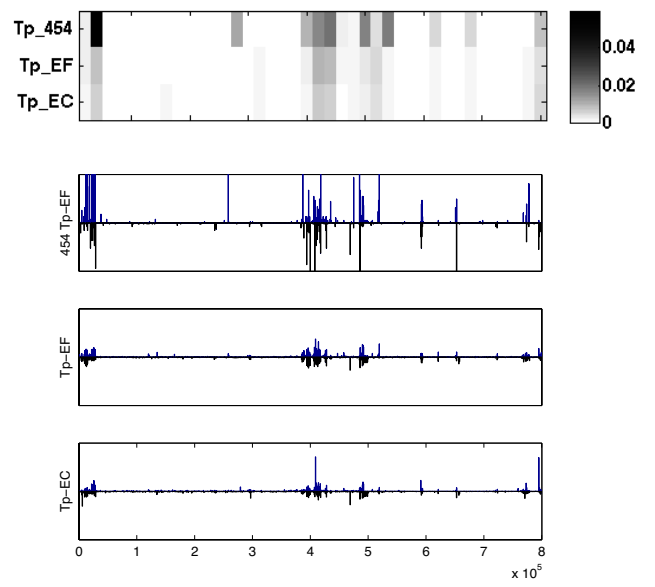

chr\_22

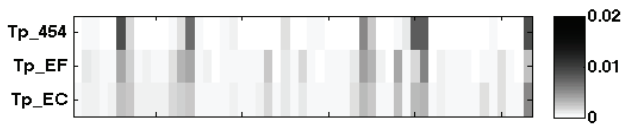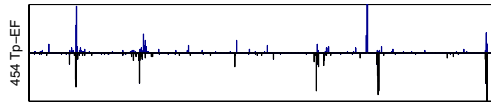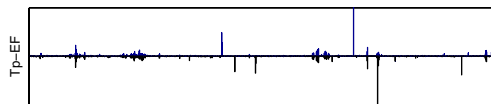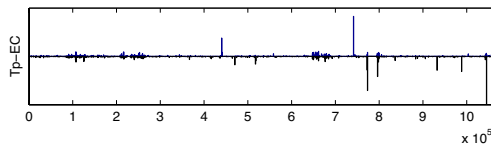

chr\_23

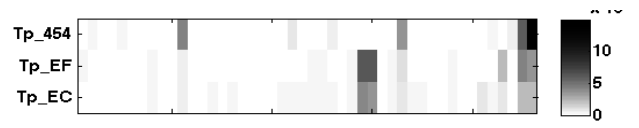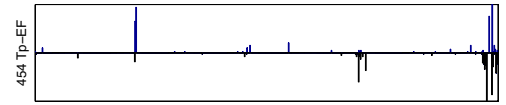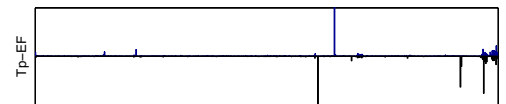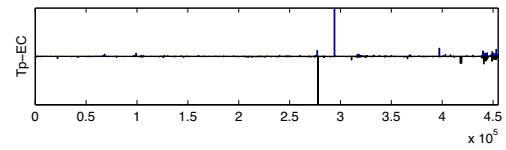

chr\_24

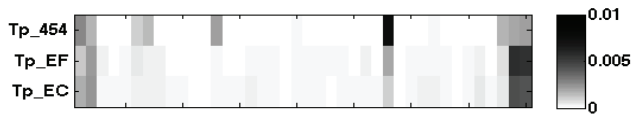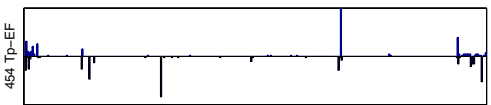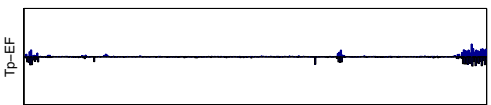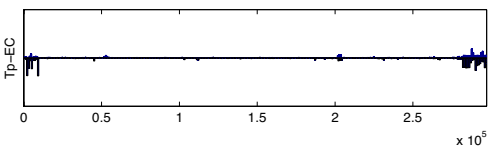

Supplement: pone.0022870.s003.pdf [file pone.0022870.s003.pdf]
