# Supplementary material for: Characterization of the Small RNA Transcriptome of the Diatom, Thalassiosira pseudonana
Source: PubMed Central journal article supplement (PMC3155517; doi:10.1371/journal.pone.0022870), 2011-08-12
Supplement: pone.0022870.s001.pdf [file pone.0022870.s001.pdf]

**A**

454 sequencing data from *T. pseudonana* small RNA library  
(305,484 sequences)

Removal of sequences containing  
incomplete adapters  
(287,560 sequences)

Clustering to reduce redundancy  
(19,890 unique consensus sequences)

Removal of rRNA and tRNA degradation products  
(9,106 non-degraded sequences)

Search genome for sequences, retaining matches  
(4,287 small RNA candidates)

Prediction of microRNA  
candidates  
(0 candidates)

Prediction of repeat-associated  
siRNA candidates  
(857 candidates)

Prediction of  
antisense/sense  
endogenous siRNA candidates  
(3,732 candidates)

**B**

SOLiD sequencing data from *T. pseudonana* small RNA libraries  
(17,047,245 sequences)

Conversion of colorspace data to basespace data  
using CLCbio "tofasta" software

Trim off extra nucleotides on each sequence by aligning the  
sequences to the genome and retaining matches  
(3,817,895 sequences)

Clustering to reduce redundancy for each condition  
(675,173 unique consensus sequences)

Removal of rRNA and tRNA degradation products  
(602,087 small RNA candidate pool)

Prediction of microRNA  
candidates  
(29 candidates)

Prediction of repeat-associated  
siRNA candidates  
(8093 candidates SOLiD EF)  
(19,006 candidates in SOLiD EC)

Prediction of  
antisense/sense  
endogenous siRNA candidates  
(100,538 candidates in SOLiD EF)  
(478,279 candidates in SOLiD EC)
