# Supplementary material for: Characterization of the Small RNA Transcriptome of the Diatom, Thalassiosira pseudonana
Source: PubMed Central journal article supplement (PMC3155517; doi:10.1371/journal.pone.0022870), 2011-08-12
Supplement: pone.0022870.s002.pdf [file pone.0022870.s002.pdf]

## Argonaute

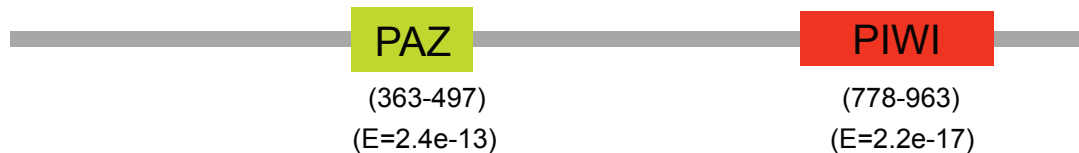

Jgi|Thaps3|20630|estExt\_fgenesh1\_pg.C\_chr\_10162

## Dicer-like proteins

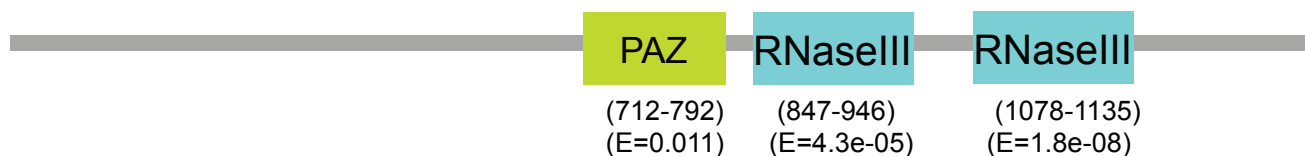

Jgi|Thaps3|264746|thaps1\_ua\_kg.chr\_20000087

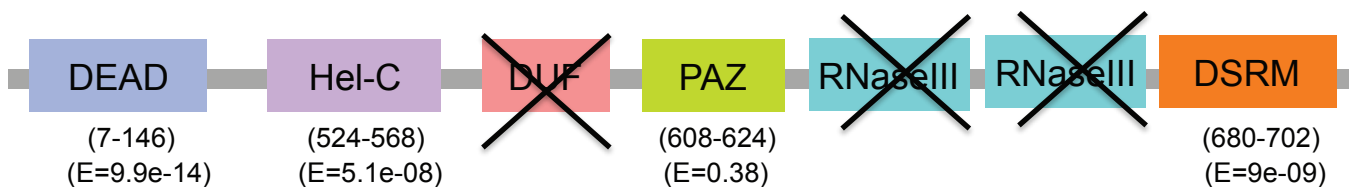

Jgi|Thaps3|20605|estExt\_fgenesh1\_pg.C\_chr\_10107

## RNA dependent RNA polymerase (RdRP)

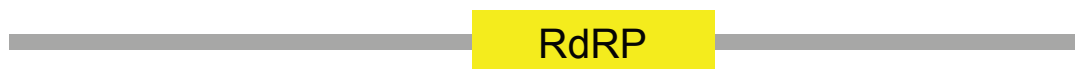

Jgi|Thaps3|5028|fgenesh1\_pg.C\_chr\_5000070 (nt #730-763) (E=4.4e-06)

Jgi|Thaps3|9018|fgenesh1\_pg.C\_chr\_12000099 (nt #591-610) (E=0.00014)

Jgi|Thaps3|22277|estExt\_fgenesh1\_pg.C\_chr\_40436 (nt #1081-1129) (E=0.00018)
