# Supplementary material for: Characterization of the Small RNA Transcriptome of the Diatom, Thalassiosira pseudonana
Source: PLoS One. 2011 Aug 12;6(8):e22870. doi: 10.1371/journal.pone.0022870 (PMC3155517; doi:10.1371/journal.pone.0022870)
Supplement: Table S1 — List of microRNA candidates in the T. pseudonana genome. This file contains the information about the sequences that folded into hairpin structures, and were thereby classified as miRNA candidates. The information includes the length, number of reads, mature miRNA sequence, terminal loop length, location of match to T. pseudonana genome (chr∶start-end), orientation, mature miRNA structure in RNAfold notation, minimum free energy of the hairpin structure, miRNA* name and sequence if present, precursor length, and sequences that contributed to the prediction. (XLS) [file pone.0022870.s005.xls]

## Sheet: predDeftab_folds.txt
miRNA candidate ID	length	total	mature miRNA sequence	loop	chr#	start	end	miRDeep	mature miRNA	precursor	miRDeep	mfe	miRNA* ID (if present)	miRNA* sequence	IDs of sequences contributing to prediction
		reads		length				orientation	structure	length	pri_id
1008_1638_234_F3!AR2_G00032_24nts_x1	24	2	CCACCTAATCACATTGCACAAACG	59	chr_5	2170092	2170115	+	))).)).)))).)))))))..)).	127	chr_5_6437	-32.29			1008_1638_234_F3!AR2_G00032_24nts_x1	161..184	Plus / Plus	1204_238_151_F3!AR2_G31013_24nts_x1	161..184	Plus / Plus
1053_1515_1221_F3!AR2_G31013_23nts_x1	23	2	CAAGCTACCATCAAGTCATGTCC	21	chr_8	433353	433375	+	))..)).))))))..))))))))	84	chr_8_6950	-27.22	1254_83_1816_F3!AR2_G31013_20nts_x1	GGATCATGGTGATGGAGATG	1254_83_1816_F3!AR2_G31013_20nts_x1	101..120	Plus / Plus	1053_1515_1221_F3!AR2_G31013_23nts_x1	144..166	Plus / Plus
1072_1906_853_F3!AR2_G31013_22nts_x1	22	2	CGACATGCCGTTGCACAGCAGA	33	chr_4	714888	714909	+	.((.(((.(((((...(((..(	110	chr_4_3589	-27.1	932_1543_646_F3!AR2_G31013_24nts_x1	GCTTCCAACGTCGTATCATGACTT	1072_1906_853_F3!AR2_G31013_22nts_x1	23..44	Plus / Plus	932_1543_646_F3!AR2_G31013_24nts_x1	79..102	Plus / Plus
1172_810_1068_F3!AR2_G31013_23nts_x4	23	5	GACTCCTGTGCTGTCATTGACCC	25	chr_2	1859289	1859311	+	..((((((((((...((((.(((	111	chr_2_9038	-30.8	1034_266_1639_F3!AR2_G31013_20nts_x1	GGCAATTCTCAAGCGTCACG	1172_810_1068_F3!AR2_G31013_23nts_x4	23..45	Plus / Plus	1034_266_1639_F3!AR2_G31013_20nts_x1	70..89	Plus / Plus
1177_1978_318_F3!AR2_G00032_20nts_x2	20	3	TCTAATGAGTGCCTTGGCCG	12	chr_1	176970	176989	+	)))).))).).)).))).))	96	chr_1_986	-24.7	864_215_503_F3!AR2_G31013_21nts_x1	CCATGGAGTTGATAGAGCTTC	864_215_503_F3!AR2_G31013_21nts_x1	23..43	Plus / Plus	1177_1978_318_F3!AR2_G00032_20nts_x2	53..72	Plus / Plus
1180_1482_783_F3!AR2_G31013_21nts_x2	21	3	ATGGCAATTGTACGGGGTACA	28	chr_2	795066	795086	+	.))))))))))))..))))..	113	chr_2_22298	-28.32	1380_47_578_F3!AR1_G00032_23nts_x1	GCCAGTACGATTGATCAGAGAAA	1380_47_578_F3!AR1_G00032_23nts_x1	23..45	Plus / Plus	1180_1482_783_F3!AR2_G31013_21nts_x2	71..91	Plus / Plus
1233_1805_1228_F3!AR2_G00032_22nts_x1	22	2	CCGTTCCAATCATTGTGTGTCG	38	chr_7	1111836	1111857	+	..((((((.(((..(.(((..(	122	chr_7_3289	-27.7			1433_651_1937_F3!AR1_G31013_21nts_x1	101..121	Plus / Plus	1233_1805_1228_F3!AR2_G00032_22nts_x1	101..122	Plus / Plus
1345_1590_717_F3!AR1_G00032_21nts_x1	21	2	GAGGAGTAGAAAAGAACGGAC	31	chr_3	1186019	1186039	+	..))))).))..))).)))))	110	chr_3_5999	-38.9			1398_1439_75_F3!AR1_G31013_22nts_x1	67..88	Plus / Plus	1345_1590_717_F3!AR1_G00032_21nts_x1	68..88	Plus / Plus
1374_1433_1030_F3!AR1_G31013_22nts_x13	22	14	GCCCCTGGTTTCTCCCCTCGCC	27	chr_5	915619	915640	+	))))))..))))).)))))...	80	chr_5_18224	-37.3			1374_1433_1030_F3!AR1_G31013_22nts_x13	67..88	Plus / Plus	1226_2007_172_F3!AR2_G00032_22nts_x1	73..94	Plus / Minus
1381_423_1947_F3!AR1_G31013_20nts_x12	20	17	GGTTGACATTCTATTCCAAT	46	chr_5	569337	569356	+	..(((.((..((((((((((	110	chr_5_19960	-30.1			1381_423_1947_F3!AR1_G31013_20nts_x12	23..42	Plus / Plus	1197_677_290_F3!AR2_G00032_20nts_x5	24..43	Plus / Plus
1393_802_253_F3!AR1_G31013_21nts_x2	21	3	CCTGGTCTGCCATCTATGCCG	14	chr_5	778913	778933	+	(((.((((..(((((..((.(	132	chr_5_3760	-36.6	1231_511_174_F3!AR2_G31013_25nts_x1	CCGCTAGAAGATGAAGACGAGGACA	1393_802_253_F3!AR1_G31013_21nts_x2	23..43	Plus / Plus	1231_511_174_F3!AR2_G31013_25nts_x1	56..80	Plus / Plus
1394_1396_402_F3!AR1_G31013_23nts_x3	23	4	GTCTCATCATCAGTGTATCCTTC	43	chr_5	1646143	1646165	+	))))..))))))..).)))))..	110	chr_5_7883	-32.2			1394_1396_402_F3!AR1_G31013_23nts_x3	66..88	Plus / Plus	1181_1257_1428_F3!AR2_G00032_21nts_x1	68..88	Plus / Plus
1408_1985_285_F3!AR1_G31013_23nts_x2	23	3	CTGCTATCTTAAGAGTTCTCCGT	39	chr_9	831490	831512	+	)).)).))..)))))))..))))	102	chr_9_4952	-28.8			1499_1033_1519_F3!AR1_G00032_22nts_x1	101..122	Plus / Plus	1408_1985_285_F3!AR1_G31013_23nts_x2	121..143	Plus / Plus
1427_942_1564_F3!AR1_G31013_20nts_x7	20	10	CCTCCCGTCCTCCACATTCG	56	chr_1	2969350	2969369	+	(((((.((.((((.(((((.	121	chr_1_9419	-33.45			1309_912_1338_F3!AR1_G00032_20nts_x2	101..120	Plus / Plus	1427_942_1564_F3!AR1_G31013_20nts_x7	101..120	Plus / Plus	1516_1866_1423_F3!AR1_G31013_35nts_x1	101..135	Plus / Plus
1431_1377_1517_F3!AR1_G31013_23nts_x3	23	4	GACGTATGATGCAGCTCTCTACC	22	chr_4	1518697	1518719	+	...(..(.((((((((((((...	110	chr_4_16683	-33			1431_1377_1517_F3!AR1_G31013_23nts_x3	23..45	Plus / Plus	1175_957_1906_F3!AR2_G00032_24nts_x1	23..46	Plus / Plus
1442_152_704_F3!AR1_G31013_22nts_x6	22	7	CCCAACACGGTAGTTCTCCCTC	34	chr_22	174324	174345	+	..((((((((..(..(((.(((	110	chr_22_9776	-25.4			1439_683_1202_F3!AR1_G00032_22nts_x1	23..44	Plus / Plus	1442_152_704_F3!AR1_G31013_22nts_x6	23..44	Plus / Plus
1476_61_668_F3!AR1_G00032_23nts_x2	23	3	GACAATTGGTGAAGGATGGACAT	50	chr_22	562429	562451	+	((((...(((.((((..((((((	116	chr_22_4893	-27.3			1476_61_668_F3!AR1_G00032_23nts_x2	101..123	Plus / Plus	1232_1336_785_F3!AR2_G31013_21nts_x1	124..144	Plus / Plus
1499_1964_1108_F3!AR1_G31013_20nts_x1	20	2	CCTCTCAGCTCGTCTTTGAG	11	chr_2	844633	844652	+	))))).)))).)))))..))	70	chr_2_4147	-23.5	1167_720_700_F3!AR2_G31013_21nts_x1	GCAGTTTCAGAAGCGAGCGGT	1167_720_700_F3!AR2_G31013_21nts_x1	23..43	Plus / Plus	1499_1964_1108_F3!AR1_G31013_20nts_x1	51..70	Plus / Plus
1508_336_693_F3!AR1_G00032_24nts_x2	24	3	GTGTGAAGGCGTTGATTTGGAAGC	16	chr_19c_29	270280	270303	+	(..(((((((((.((.(((...((	110	chr_19c_29_1575	-33.3			920_1193_515_F3!AR2_G31013_20nts_x1	3..22	Plus / Plus	1508_336_693_F3!AR1_G00032_24nts_x2	4..27	Plus / Plus
1518_886_1823_F3!AR1_G31013_20nts_x1	20	2	AGCAACTCACACCAGCACGC	12	chr_5	1617459	1617478	+	))))).)).)).)))).)))	93	chr_5_9202	-23.6			1413_450_1351_F3!AR1_G00032_20nts_x1	101..120	Plus / Plus	1518_886_1823_F3!AR1_G31013_20nts_x1	103..122	Plus / Plus
1529_1170_904_F3!AR1_G31013_23nts_x3	23	5	ACGACGTTCTCACTCCTCTCGCC	14	chr_3	1756501	1756523	+	..(((((((...((((.(((...	85	chr_3_15531	-21.87			1406_1576_676_F3!AR1_G00032_25nts_x1	26..50	Plus / Plus	1529_1170_904_F3!AR1_G31013_23nts_x3	28..50	Plus / Plus	1351_222_430_F3!AR1_G31013_25nts_x1	29..53	Plus / Plus
1567_164_827_F3!AR1_G31013_24nts_x1	24	3	GGAGTCTCTTGTGAAGGAGAAGGG	41	chr_6	738025	738048	+	)).)))))))))))).)))..)).	131	chr_6_17144	-36.4	1542_350_806_F3!AR1_G31013_26nts_x1	CATTCGCATGAGAGAGCGCCTTGACG	1542_350_806_F3!AR1_G31013_26nts_x1	23..48	Plus / Plus	1407_689_301_F3!AR1_G00032_20nts_x1	50..69	Plus / Plus	1567_164_827_F3!AR1_G31013_24nts_x1	86..109	Plus / Plus
1595_1216_233_F3!AR1_G31013_22nts_x2	22	3	GCCAATGTGGTAGCGAATCCAT	47	chr_18	663893	663914	+	((((.((((.((((..((((((	112	chr_18_3078	-33.7	1397_930_755_F3!AR1_G31013_22nts_x1	TCAGCTCAGTATAGTGGTATGG	1397_930_755_F3!AR1_G31013_22nts_x1	101..122	Plus / Plus	1595_1216_233_F3!AR1_G31013_22nts_x2	29..50	Plus / Plus
1599_1566_1907_F3!AR1_G31013_20nts_x2	20	3	GGCAATGGATGCACTACGGG	48	chr_8	907368	907387	+	(((.(((((((((((((((.	109	chr_8_5449	-42.6	1244_653_1903_F3!AR2_G31013_24nts_x1	GCTCGTTTAAGCATCCGTTCCTTC	1599_1566_1907_F3!AR1_G31013_20nts_x2	101..120	Plus / Plus	1244_653_1903_F3!AR2_G31013_24nts_x1	140..163	Plus / Plus
898_725_1897_F3!AR2_G31013_23nts_x1	23	2	GCACCTATTGATGCTAGCTATGC	22	chr_12	740339	740361	+	(((...((((((((.(((...((	84	chr_12_4883	-23.4	1445_1262_1944_F3!AR1_G00032_21nts_x1	GCTGCATCAATTGCAAATACC	898_725_1897_F3!AR2_G31013_23nts_x1	101..123	Plus / Plus	1445_1262_1944_F3!AR1_G00032_21nts_x1	149..169	Plus / Plus
906_1399_882_F3!AR2_G31013_20nts_x1	20	2	GCTGTCACGTGTAGGAGACC	49	chr_5	2226063	2226082	+	(.(((...(((.(((((.((	116	chr_5_6639	-38.9	1387_229_1970_F3!AR1_G31013_22nts_x1	GCTCCTCGTTCACCACCAACAC	906_1399_882_F3!AR2_G31013_20nts_x1	101..120	Plus / Plus	1387_229_1970_F3!AR1_G31013_22nts_x1	170..191	Plus / Plus
918_1375_288_F3!AR2_G31013_21nts_x7	21	15	GATGGATCATTCAATGGGATG	40	chr_1	2820296	2820316	+	(.(.((.(((((((((.((..	110	chr_1_15943	-27.3			1472_671_1450_F3!AR1_G00032_21nts_x7	23..43	Plus / Plus	918_1375_288_F3!AR2_G31013_21nts_x7	23..43	Plus / Plus	1068_1912_748_F3!AR2_G31013_26nts_x1	71..96	Plus / Minus
921_306_230_F3!AR2_G31013_21nts_x451	21	524	TGCAACGTCCCGGGTTCGATT	13	chr_14	17971	17991	+	)))..))))).)))...).))	120	chr_14_84	-35.8	1074_371_726_F3!AR2_G31013_19nts_1	ACTCCTTCGGATGCAGTTA	1280_1965_275_F3!AR1_G31013_21nts_x66	56..76	Plus / Plus	921_306_230_F3!AR2_G31013_21nts_x451	57..77	Plus / Plus	1435_613_329_F3!AR1_G31013_20nts_x6	71..90	Plus / Plus	1366_333_1377_F3!AR1_G00032_20nts_x1	79..98	Plus / Plus	1074_371_726_F3!AR2_G31013_19nts_1
929_478_777_F3!AR2_G00032_23nts_x1	23	2	CCTCGGCCTCCATATTCCGGAAA	20	chr_18	701168	701190	+	((((((.((.(((.((((((...	89	chr_18_2951	-21.4			1548_2005_1457_F3!AR1_G31013_21nts_x1	101..121	Plus / Plus	929_478_777_F3!AR2_G00032_23nts_x1	101..123	Plus / Plus
			loop length total	911					total precursor length	3093
			average loop length	31.4138					average prec length	106.655
			min loop length	11					min prec length	70
			max loop length	59					max prec length	132
